# Supplementary material for: Critical View on the Qualification of Electronic Tongues Regarding Their Performance in the Development of Peroral Drug Formulations with Bitter Ingredients
Source: MDPI journal article supplement (doi:10.3390/pharmaceutics16050658), 2024-05-15
Supplement: s1 [file s1]

## Supporting information

### Critical view on the qualification of electronic tongues regard-ing their performance in the development of peroral drug for-mulations with bitter ingredients

Denise Steiner<sup>1</sup>, Alexander Meyer<sup>2</sup>, L. Isabell Immohr<sup>3</sup>, Miriam Pein-Hackelbusch<sup>2,\*</sup>

<sup>1</sup>Institute of Pharmaceutical Technology and Biopharmaceutics, University of Muenster, Corrensstraße 48, 48149 Muenster, Germany

<sup>2</sup>Institute for Life Science Technologies (ILT.NRW), Ostwestfalen-Lippe University of Applied Sciences and Arts, Campusallee 12, 32657 Lemgo, Germany

<sup>3</sup>NextPharma Germany Bidco GmbH, Hildebrandstrasse 12, 37081 Goettingen, Germany

**Table S1: Summarized information about References found in between 2014-2023; CPA = change in membrane potential due to adsorption, PCA = principal component analysis, PLS = partial least squares regression, DFA = discriminant function analysis, BATA = brief aversion taste assessment – performed with rodents, NCE = new chemical entity; HME = hot melt extrudates; ODT = orodispersible tablets; ODF = orodispersible films**

| Year | Applied electronic tongue                    | Taste-masking evaluation by |           |                                                                                                                      |            | Analysed drugs | Formulation                                                      | References |
|------|----------------------------------------------|-----------------------------|-----------|----------------------------------------------------------------------------------------------------------------------|------------|----------------|------------------------------------------------------------------|------------|
|      |                                              | Dedicated sensors           | CPA value | (Statistical) analysis of electronic tongue data                                                                     | Human data | Others         |                                                                  |            |
| 2014 | αASTREE II                                   |                             |           | PCA                                                                                                                  |            |                | Acetaminophen<br>Ibuprofen<br>Tramadol HCl<br>Sildenafil citrate | [58]       |
|      | αASTREE II                                   |                             |           | PCA                                                                                                                  | x          |                | Ebastine                                                         | [132]      |
|      | Insent TS-5000Z                              | SB2BT0                      |           | PCA and PLS                                                                                                          | x          |                | Propranolol HCl                                                  | [98]       |
|      | αASTREE II                                   |                             |           |                                                                                                                      |            |                |                                                                  |            |
|      | Insent TS-5000Z                              |                             |           | PCA                                                                                                                  |            |                | Loperamide HCl<br>Dextromethorphan HBr                           | [133]      |
|      | αASTREE II                                   |                             |           | PCA and DFA                                                                                                          | x          |                | Sildenafil citrate                                               | [57]       |
| 2015 | Insent TS-5000Z                              |                             |           | PCA                                                                                                                  |            |                | Diclofenac<br>Diclofenac sodium<br>Diclofenac potassium          | [55]       |
|      | αASTREE                                      |                             |           | PCA and PLS                                                                                                          | x          |                | Famotidine<br>Amlodipine besylate                                | [89]       |
|      | Insent TS-5000Z                              |                             |           | PCA                                                                                                                  | x          |                | Cetirizine HCl                                                   | [93]       |
| 2016 | ASTREE                                       |                             |           | PCA                                                                                                                  |            |                | Ketoprofen                                                       | [96]       |
| 2017 | Laboratory prototype potentiometric e-tongue |                             |           | PCA                                                                                                                  | x          |                | Cetirizine 2HCl                                                  | [80]       |
|      | Laboratory prototype potentiometric e-tongue |                             |           | PCA                                                                                                                  | x          |                | Cetirizine 2HCl                                                  | [90]       |
|      | αASTREE                                      |                             |           | PCA, model based on e-Tongue<br>Euclidean distance measurements, Ka<br>and Kd of the drug/cyclodextrin-<br>complexes |            |                | 44 bitter drugs                                                  | [71]       |
|      | Insent TS-5000Z                              |                             |           | PCA                                                                                                                  | x          |                | Two NCEs                                                         | [5]        |
|      | ASTREE                                       |                             |           | Bitterness score (calculated with<br>electronic tongue software)                                                     |            |                | Mefloquine HCl                                                   | [73]       |
|      | Laboratory prototype potentiometric e-tongue |                             |           | PCA                                                                                                                  | x          |                | Cetirizine 2HCl                                                  | [81]       |

| Year | Applied electronic tongue                                                  | Taste-masking evaluation by            |           |                                                                                                                                                                                                                                                                                                                    |            | Analysed drugs              | Formulation                                                       | References          |
|------|----------------------------------------------------------------------------|----------------------------------------|-----------|--------------------------------------------------------------------------------------------------------------------------------------------------------------------------------------------------------------------------------------------------------------------------------------------------------------------|------------|-----------------------------|-------------------------------------------------------------------|---------------------|
|      |                                                                            | Dedicated sensors                      | CPA value | (Statistical) analysis of electronic tongue data                                                                                                                                                                                                                                                                   | Human data | Others                      |                                                                   |                     |
| 2018 | Insent TS-5000Z                                                            |                                        |           | PCA                                                                                                                                                                                                                                                                                                                |            |                             | Ranitidine HCl                                                    | Solution [134]      |
|      | ASTREE II                                                                  |                                        |           | PCA                                                                                                                                                                                                                                                                                                                | x          |                             | Traditional chinese herbs                                         | Solution [135]      |
|      | ASTREE II                                                                  |                                        |           | PCA                                                                                                                                                                                                                                                                                                                | x          | BATA                        | Berberine HCl                                                     | Minitablets [100]   |
|      | Insent TS-5000Z                                                            | SB2AC0<br>SB2AN0<br>SB2C00<br>SB2AE1   |           | PCA                                                                                                                                                                                                                                                                                                                |            | BATA                        | Isoniazide                                                        | HME [97]            |
|      | Laboratory prototype electrochemical impedance spectroscopy-based e-tongue |                                        |           | multidimensional projection techniques such as Sammon's Mapping (SAMMON) and PCA but with Interactive Document Map showing the best results                                                                                                                                                                        |            |                             | Praziquantel                                                      | Microcapsules [136] |
|      | Insent SA402B                                                              | SB2BT0                                 |           | PCA                                                                                                                                                                                                                                                                                                                |            |                             | Quinine HCl x 2 H <sub>2</sub> O                                  | HME [137]           |
| 2019 | Insent TS-5000Z                                                            | SB2C00<br>SB2AE1<br>SB2AC0<br>SB2AN0   |           | Sensor signal                                                                                                                                                                                                                                                                                                      |            |                             | Chlorpheniramine maleate                                          | Solution [138]      |
|      | ASTREE II                                                                  |                                        |           | PCA                                                                                                                                                                                                                                                                                                                |            |                             | Rhei radix et rhizome<br>Berberine HCl<br>Scutellaria baicalensis | Powder [139]        |
|      | αASTREE                                                                    |                                        |           | PCA                                                                                                                                                                                                                                                                                                                | x          |                             | Nizatidine                                                        | Powder [84]         |
|      | Laboratory prototype voltammogram-based e-tongue                           |                                        |           | PCA                                                                                                                                                                                                                                                                                                                | x          |                             | Efavirenz                                                         | SNEDDS [105]        |
|      | Laboratory prototype potentiometric e-tongue                               |                                        |           | PCA                                                                                                                                                                                                                                                                                                                | x          |                             | Rupatadine fumarate                                               | Powder [83]         |
| 2020 | Insent TS-5000Z                                                            | SB2BT0<br>SB2AN0<br>SB2C00<br>SB2AE1   | x         | Sensor signal                                                                                                                                                                                                                                                                                                      |            | for veterinary applications | Amlodipine besylate                                               | Minitablets [99]    |
|      | Insent TS-5000Z                                                            | SB2BT0<br>SB2AN0<br>SB2C00<br>SB2AE1   | x         | PCA                                                                                                                                                                                                                                                                                                                |            |                             | Cefpodoxime proxetil                                              | Solution [140]      |
|      | Insent TS-5000Z                                                            | SB2AC0<br>SB2AN0<br>SB2C00<br>SB2AE1   |           | Sensor signal                                                                                                                                                                                                                                                                                                      | x          | BATA                        | Isoniazid<br>Rifampicin<br>Pyrazinamide<br>Ethambutol 2HCl        | Solution [106]      |
|      | Insent SA402B                                                              | SB2BT0<br>(SB2AN0<br>SB2C00<br>SB2AE1) | x         | PCA                                                                                                                                                                                                                                                                                                                | x          |                             | Atomoxetine HCl                                                   | Solution [70]       |
|      | Insent SA402B                                                              | SB2AC0<br>SB2AN0                       | x         | <i>bitterness intensity</i> estimated as:<br><i>bitterness intensity</i> 1 = 1.26 × CPA (AC0),<br><i>bitterness intensity</i> 2 = 1.80 × CPA (AN0)<br><i>bitterness scores</i> calculated on <i>bitterness intensities</i><br><i>total bitterness</i> = ( <i>bitterness score</i> 1 + <i>bitterness score</i> 2)/2 |            |                             | Propranolol HCl                                                   | Microbeads [141]    |

|  |                                              |  |     |   |  |                     |     |      |
|--|----------------------------------------------|--|-----|---|--|---------------------|-----|------|
|  | Laboratory prototype potentiometric e-tongue |  | PCA | x |  | Rupatadine fumarate | ODT | [88] |
|--|----------------------------------------------|--|-----|---|--|---------------------|-----|------|

| Year | Applied electronic tongue                                                        | Taste-masking evaluation by                              |           |                                                                                                                                                                                                                                                                |            | Analysed drugs | Formulation                                             | References         |        |
|------|----------------------------------------------------------------------------------|----------------------------------------------------------|-----------|----------------------------------------------------------------------------------------------------------------------------------------------------------------------------------------------------------------------------------------------------------------|------------|----------------|---------------------------------------------------------|--------------------|--------|
|      |                                                                                  | Dedicated sensors                                        | CPA value | (Statistical) analysis of electronic tongue data                                                                                                                                                                                                               | Human data |                |                                                         |                    | Others |
| 2021 | Insent TS-5000Z                                                                  | SB2BT0                                                   | X         | PCA                                                                                                                                                                                                                                                            |            |                | Chlorpheniramine maleate                                | Nanofibres         | [103]  |
|      | Insent TS-5000Z                                                                  | SB2AE1<br>SB2CT0<br>SB2AC0<br>SB2AN0<br>SB2C00           |           | PCA                                                                                                                                                                                                                                                            |            |                | Indomethacin<br>Furosemide                              | ODF                | [101]  |
|      | Laboratory prototype potentiometric e-tongue                                     |                                                          |           | PCA                                                                                                                                                                                                                                                            |            |                | Ketoprofen lysine                                       | Solution           | [142]  |
|      | Laboratory prototype electrochemical impedance spectroscopy-based e-tongue       |                                                          |           | Interactive Document Map (IDMAP)                                                                                                                                                                                                                               |            | BATA           | Artesunate-Mefloquine<br>Praziquantel, Benznidazole     | Tablets            | [16]   |
|      | αASTREE                                                                          |                                                          |           | Bitterness level (response value R)                                                                                                                                                                                                                            | x          | BATA           | Ibuprofen                                               | Emulsion           | [56]   |
|      | Insent TS-5000Z                                                                  | SB2C00                                                   |           | Bitterness intensity (single sensor response)                                                                                                                                                                                                                  |            |                | Caffeine                                                | Powder             | [143]  |
|      | ASTREE                                                                           |                                                          |           | PCA, PLS                                                                                                                                                                                                                                                       | x          |                | Levetiracetam                                           | ODT                | [91]   |
|      | Laboratory prototype taste biosensor (rat cardiomyocytes + microelectrode assay) |                                                          |           | Multiple feature extraction and parameter visualization for high-content analysis                                                                                                                                                                              |            |                | Denatonium benzoate<br>Quinine<br>Dephenidol<br>Arbutin | Solution           | [144]  |
| 2022 | ASTREE II                                                                        |                                                          |           | PCA                                                                                                                                                                                                                                                            |            |                | Levocetirizine 2HCl                                     | Nanofibres         | [104]  |
|      | Laboratory prototype potentiometric e-tongue                                     |                                                          |           | Supervised LDA                                                                                                                                                                                                                                                 |            |                | Ranitidine HCl                                          | Solution           | [74]   |
|      | Laboratory prototype potentiometric e-tongue                                     |                                                          |           | PCA                                                                                                                                                                                                                                                            | x          |                | Rupatadine fumarate                                     | ODFs               | [145]  |
|      | cTongue; Shanghai Baosheng, Shanghai, China                                      |                                                          |           | PCA                                                                                                                                                                                                                                                            |            |                | Berberine<br>Phillyrin                                  | Solution           | [146]  |
|      | Insent SA402B                                                                    | SB2AE1<br>SB2CT0<br>SB2AAE<br>SB2CA0<br>SB2C00<br>SB2GL1 |           | Peptides were dissolved in water and added to an 1 mM quinine HCl solution – bitterness intensity reduction activity was calculated based on the Δ sensor responses against quinine HCl as blank control and a particular peptide (LEGSLE) as positive control |            |                | Nebulin-derived peptides                                | Solution           | [147]  |
|      | Insent TS-5000Z                                                                  | SB2BT0<br>SB2AN0<br>SB2C00<br>SB2AE1                     | x         | Sensor signal                                                                                                                                                                                                                                                  | x          |                | Oseltamivir phosphate                                   | HME                | [87]   |
| 2023 | Laboratory prototype potentiometric e-tongue                                     |                                                          |           | PCA                                                                                                                                                                                                                                                            |            |                | Rosuvastatin calcium                                    | Granules (pellets) | [86]   |
|      | ASTREE                                                                           |                                                          |           | Relative distances                                                                                                                                                                                                                                             | x          |                | Azithromycin                                            | Granules (pellets) | [85]   |
|      | Insent TS-5000Z                                                                  | SB2C00<br>SB2AE1<br>SB2AN0                               | x         | Sensor signal                                                                                                                                                                                                                                                  |            |                | Carbamazepine                                           | ODT                | [92]   |

|      | Insent SA402B             | umami, saltiness, sourness, bitterness x         | Random Forest, backpropagation neural network, K-nearest neighbour, support vector machine |                                                  | uf-GC e-nose | Bear pile powder                      | Powder      | [148]      |
|------|---------------------------|--------------------------------------------------|--------------------------------------------------------------------------------------------|--------------------------------------------------|--------------|---------------------------------------|-------------|------------|
|      | Insent TS-5000Z           | SB2C00 x<br>SB2AN0<br>SB2BT0<br>SB2AE1           | Bitter value                                                                               | x                                                |              | Berberine HCl                         | Solution    | [75]       |
| Year | Applied electronic tongue | Taste-masking evaluation by                      |                                                                                            |                                                  |              | Analysed drugs                        | Formulation | References |
|      |                           | Dedicated sensors                                | CPA value                                                                                  | (Statistical) analysis of electronic tongue data | Human data   | Others                                |             |            |
| 2023 | Insent SA402B             | SB2AN0 x                                         |                                                                                            | Sensor signal                                    | x            | Ibuprofen<br>Flurbiprofen<br>Naproxen | Solution    | [149]      |
|      | Insent SA402B             | SB2CA0 x<br>SB2C00<br>SB2AE1<br>SB2AAE<br>SB2CT0 |                                                                                            | PCA                                              |              | Lisdexamfetamine                      | Tablets     | [150]      |
|      | Insent SA402B             | SB2BT0 X                                         |                                                                                            | Sensor signal                                    |              | Diphenhydramine HCl                   | Granules    | [82]       |
|      | Insent SA402B             | SB2AC0<br>SB2AN0<br>SB2C00<br>SB2AE1             |                                                                                            | PCA and calculation of bitterness scores         |              | Propranolol HCl                       | Solution    | [72]       |

Klicken oder tippen Sie hier, um Text einzugeben.
